# Supplementary material
Source: PubMed Central journal article supplement (PMC9988866)
Supplement: 41598_2023_30771_MOESM1_ESM.pdf [file 41598_2023_30771_MOESM1_ESM.pdf]

## **Interaction of hemorphins with ACE homologs**

Amie Jobe<sup>1</sup>, Priya Antony<sup>1</sup>, Suhib Altabbal<sup>1</sup>, Yusra Al Dhaheri<sup>1</sup>, and Ranjit Vijayan<sup>1,2,3,\*</sup>

<sup>1</sup> Department of Biology, College of Science, United Arab Emirates University, PO Box 15551, Al Ain, United Arab Emirates.

<sup>2</sup> The Big Data Analytics Center, United Arab Emirates University, PO Box 15551, Al Ain, United Arab Emirates.

<sup>3</sup> Zayed Center for Health Sciences, United Arab Emirates University, PO Box 17666, Al Ain, United Arab Emirates.

\* Correspondence: [ranjit.v@uaeu.ac.ae](mailto:ranjit.v@uaeu.ac.ae)

Supplementary Information

A

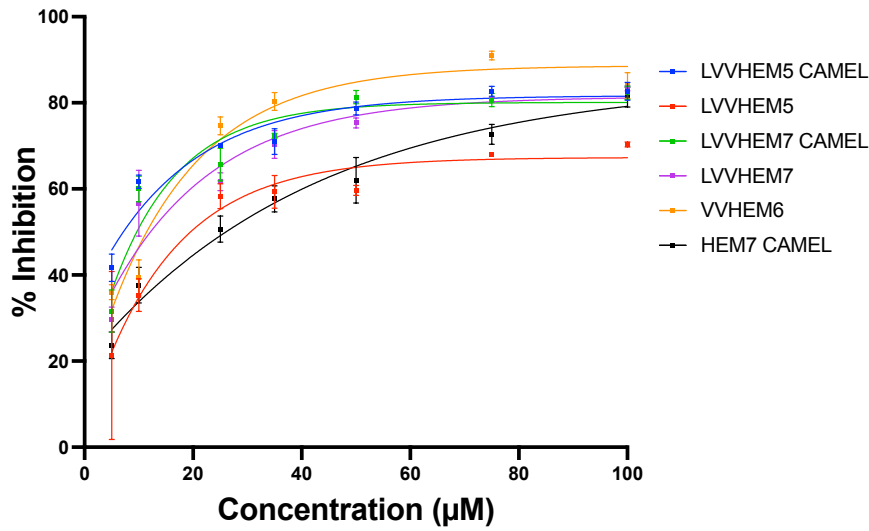

B

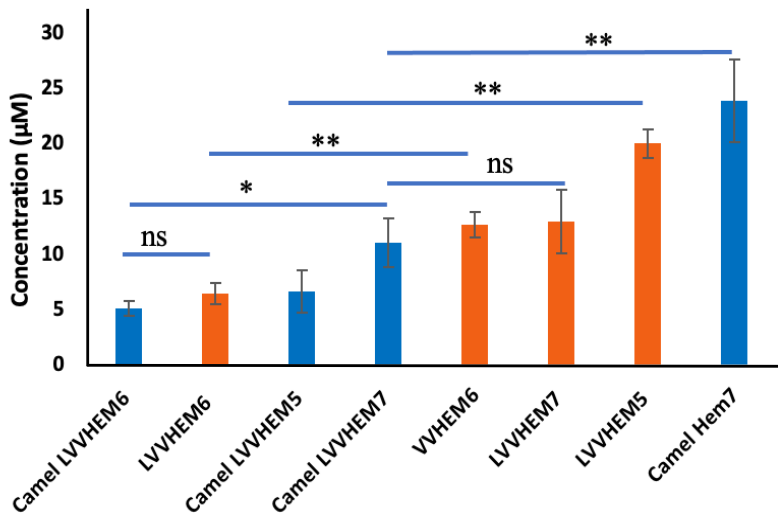

Figure S1: Dose-response curves of the top-eight hemorphin peptides against ACE1. A. Dose-response curves of camel LVVHem5, LVVHem5, camel LVVHem7, LVVHem7, VVHem6, and camel Hem7. Data are presented as mean  $\pm$  Standard Error of Mean of three independent experiments. B.  $IC_{50}$  of the eight peptides expressed in micro molar ( $\mu$ M) units. Data are represented as mean  $\pm$  SD of the three independent experiments. Statistical significance between hemorphins compared in this study are shown. \*\*\*  $p < 0.001$ , \*\*  $p < 0.01$ , \*  $p < 0.05$ , and ns  $p > 0.05$ .

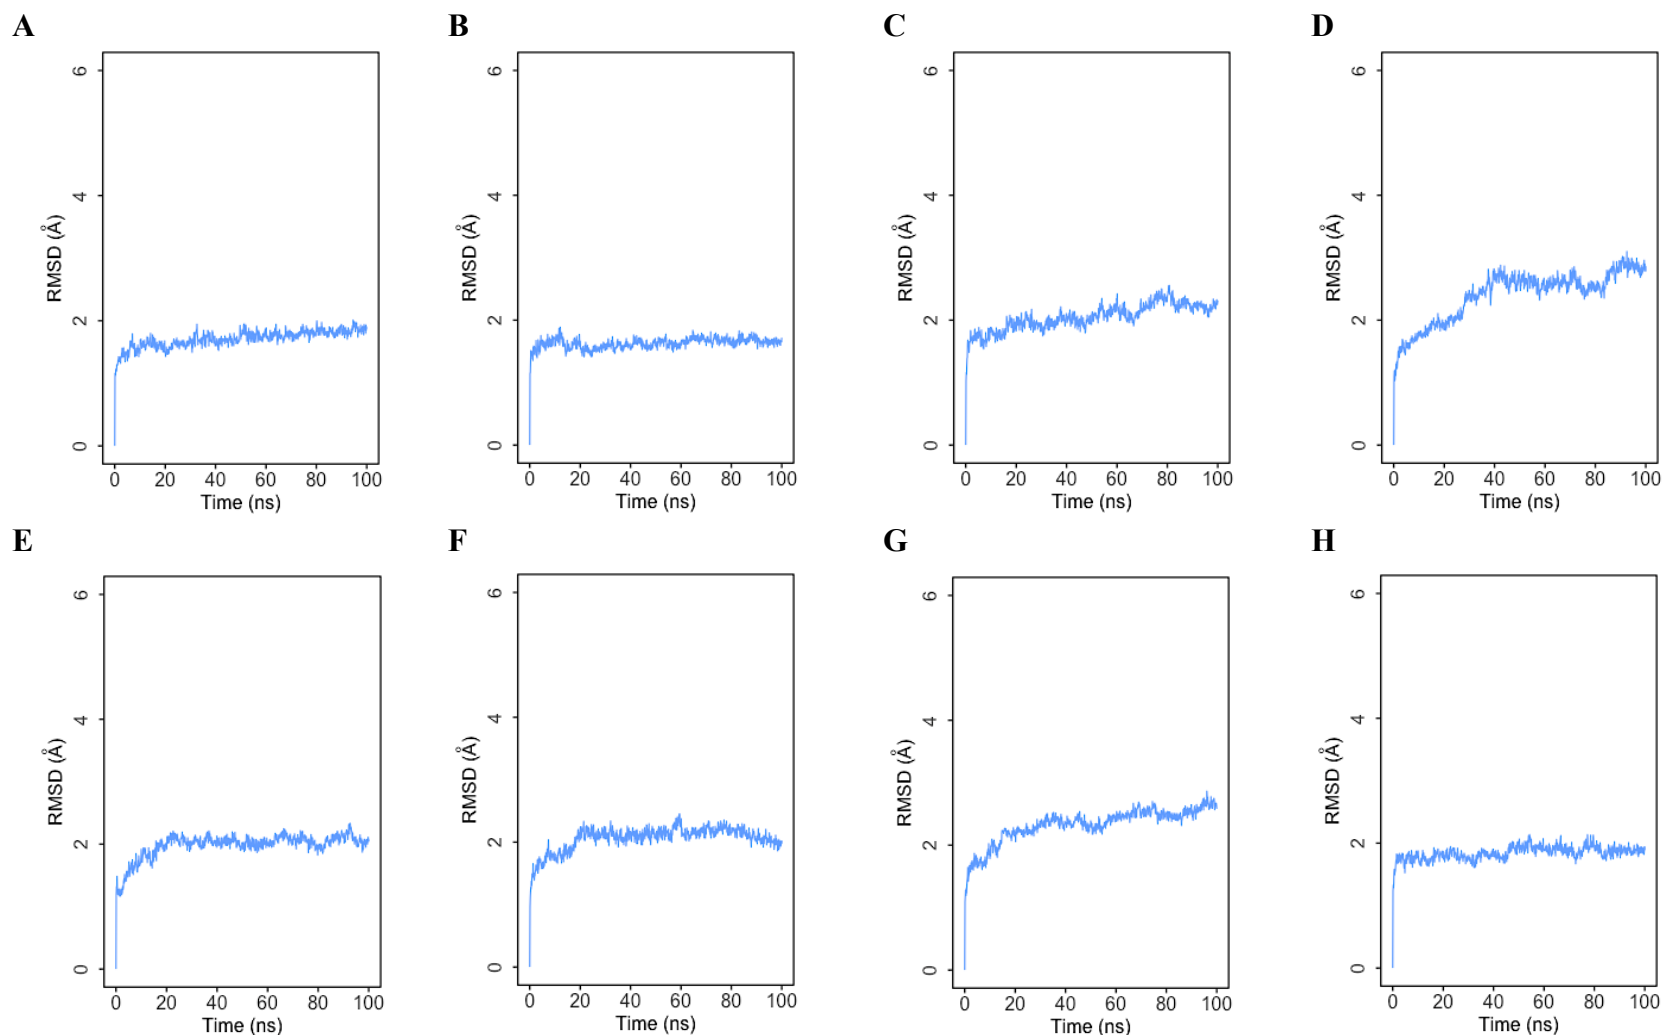

Figure S2: Root mean square standard deviation (RMSD) of protein C $\alpha$  atoms obtained from the 100ns simulation of the tested hemorphin peptides bound to ACE1 and ACE2. (A) Simulation of camel LVVHem6 with ACE1 (B) Simulation of LVVHem6 with ACE1 (C) Simulation of camel LVVHem5 with ACE1 (D) Simulation of camel LVVHem7 with ACE1 (E) Simulation of VVHem6 with ACE1 (F) Simulation of LVVHem7 with ACE1 (G) Simulation of LVVHem5 with ACE1 (H) Simulation of camel Hem7 with ACE1.

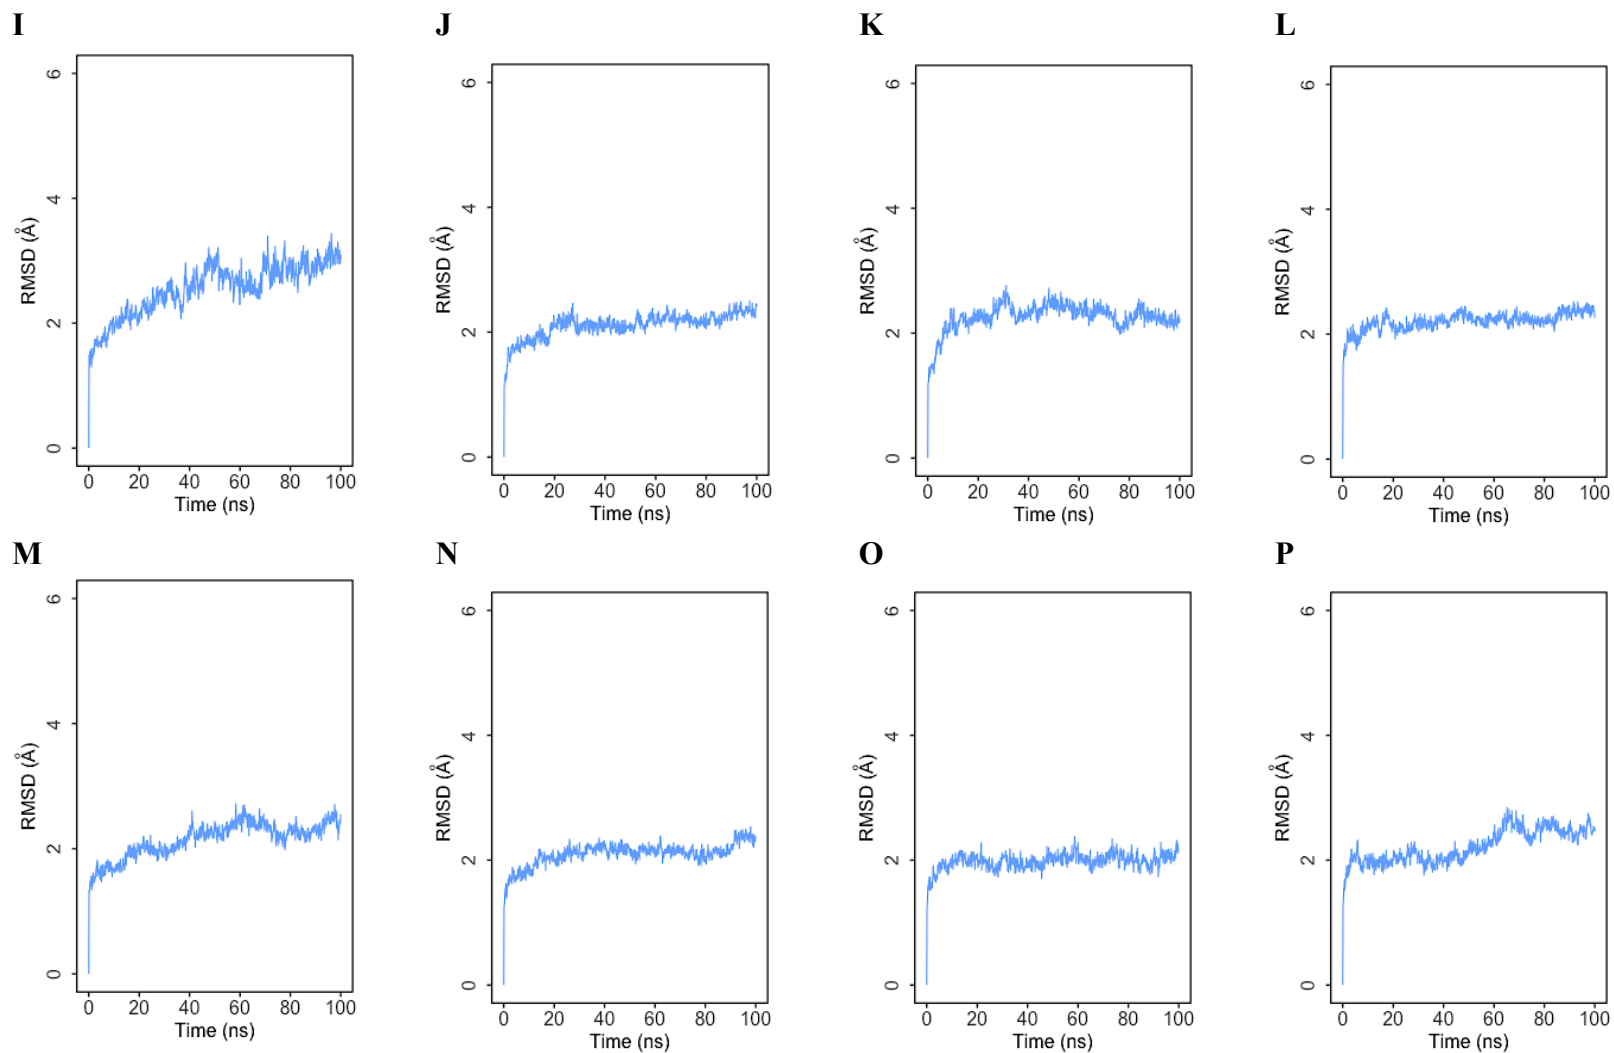

Figure S2: Root mean square standard deviation (RMSD) of protein Cα atoms obtained from the 100ns simulation of the tested hemorphin peptides bound to ACE1 and ACE2. (I) Simulation of camel LVVHem6 with ACE2 (J) Simulation of LVVHem6 with ACE2 (K) Simulation of camel LVVHem5 with ACE2 (L) Simulation of camel LVVHem7 with ACE2 (M) Simulation of VVHem6 with ACE2 (N) Simulation of LVVHem7 with ACE2 (O) Simulation of LVVHem5 with ACE2 (P) Simulation of camel Hem7 with ACE2.

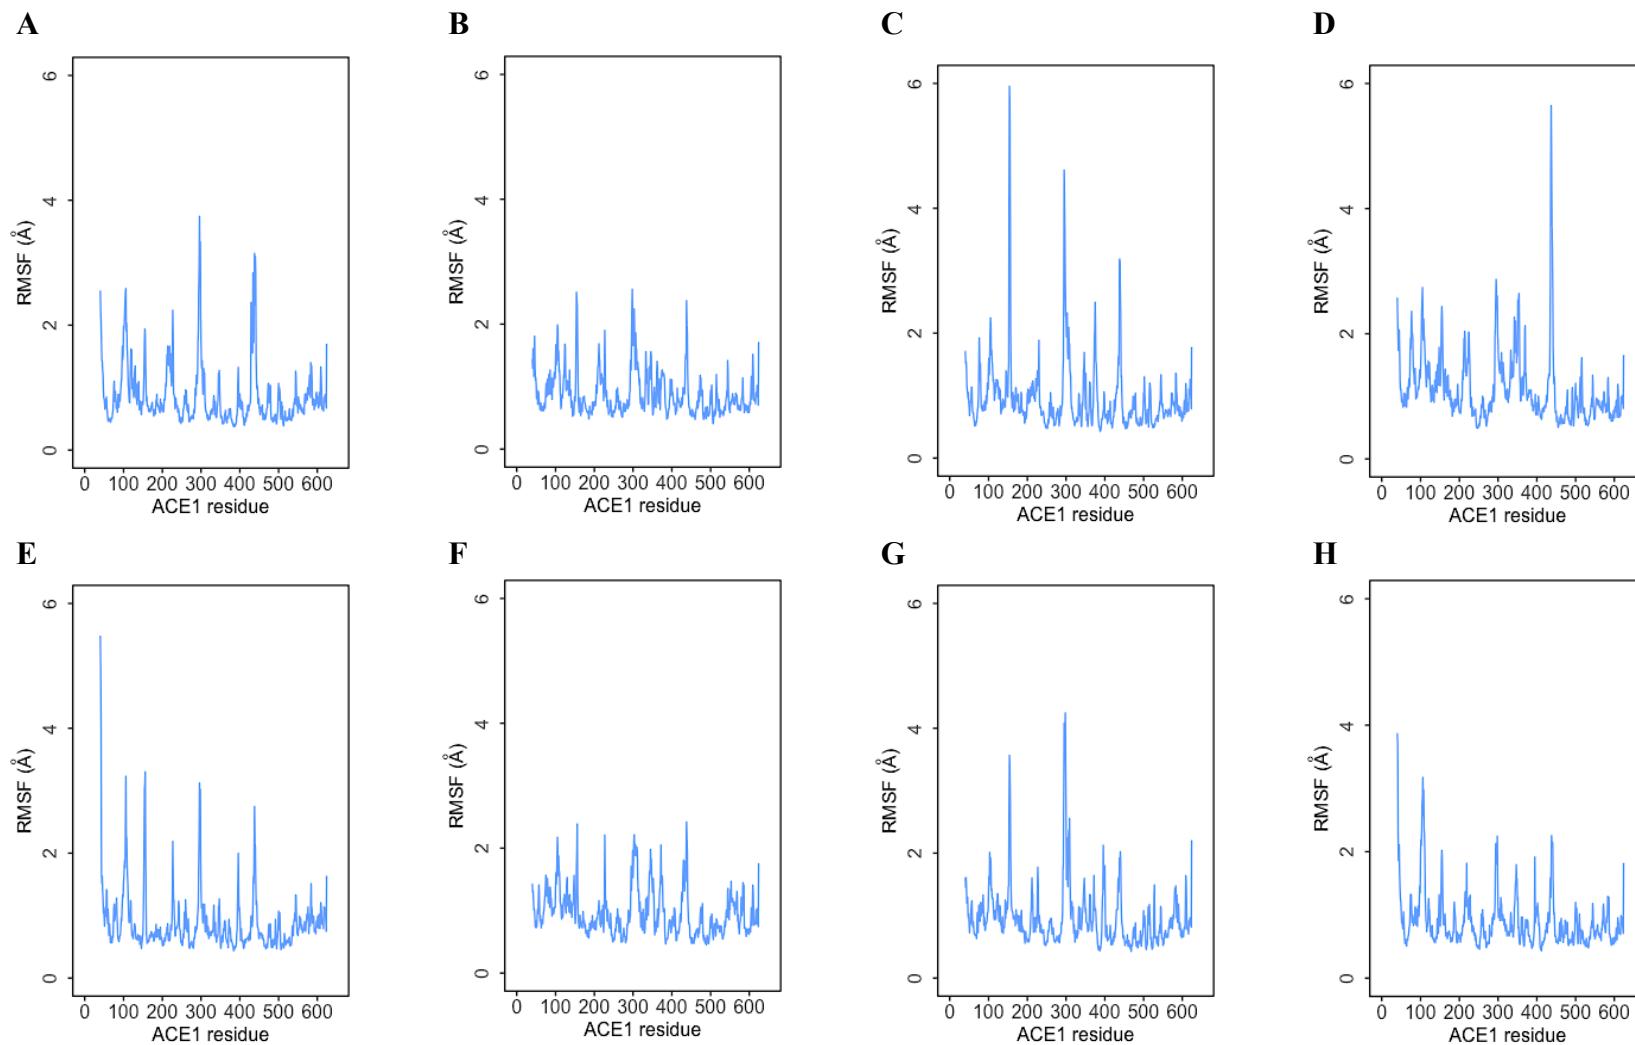

Figure S3: Root mean square fluctuation (RMSF) plots obtained from the 100 ns simulations of the tested hemorphin peptides with ACE1 and ACE2. (A) Simulation of camel LVVHem6 with ACE1 (B) Simulation of LVVHem6 with ACE1 (C) Simulation of camel LVVHem5 with ACE1 (D) Simulation of camel LVVHem7 with ACE1 (E) Simulation of VVHem6 with ACE1 (F) Simulation of LVVHem7 with ACE1 (G) Simulation of LVVHem5 with ACE1 (H) Simulation of camel Hem7 with ACE1.

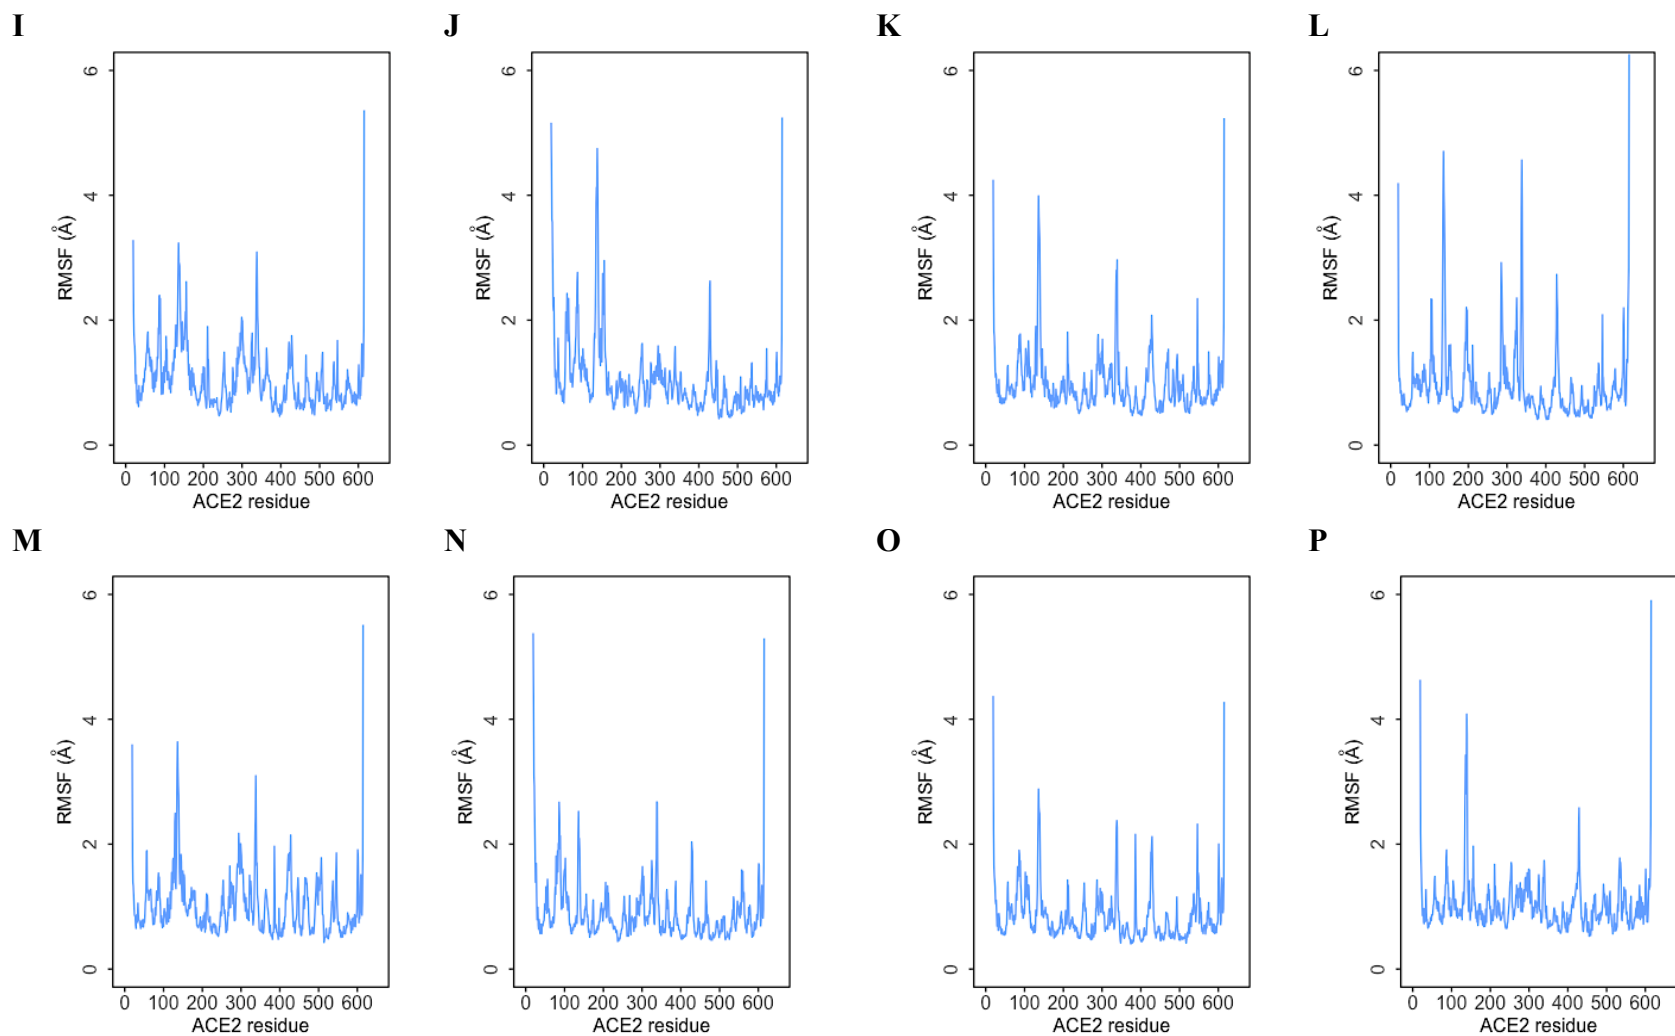

Figure S3: Root mean square fluctuation (RMSF) plots obtained from the 100 ns simulations of the tested hemorphin peptides with ACE1 and ACE2. (I) Simulation of camel LVVHem6 with ACE2 (J) Simulation of LVVHem6 with ACE2 (K) Simulation of camel LVVHem5 with ACE2 (L) Simulation of camel LVVHem7 with ACE2 (M) Simulation of VVHem6 with ACE2 (N) Simulation of LVVHem7 with ACE2 (O) Simulation of LVVHem5 with ACE2 (P) Simulation of camel Hem7 with ACE2.

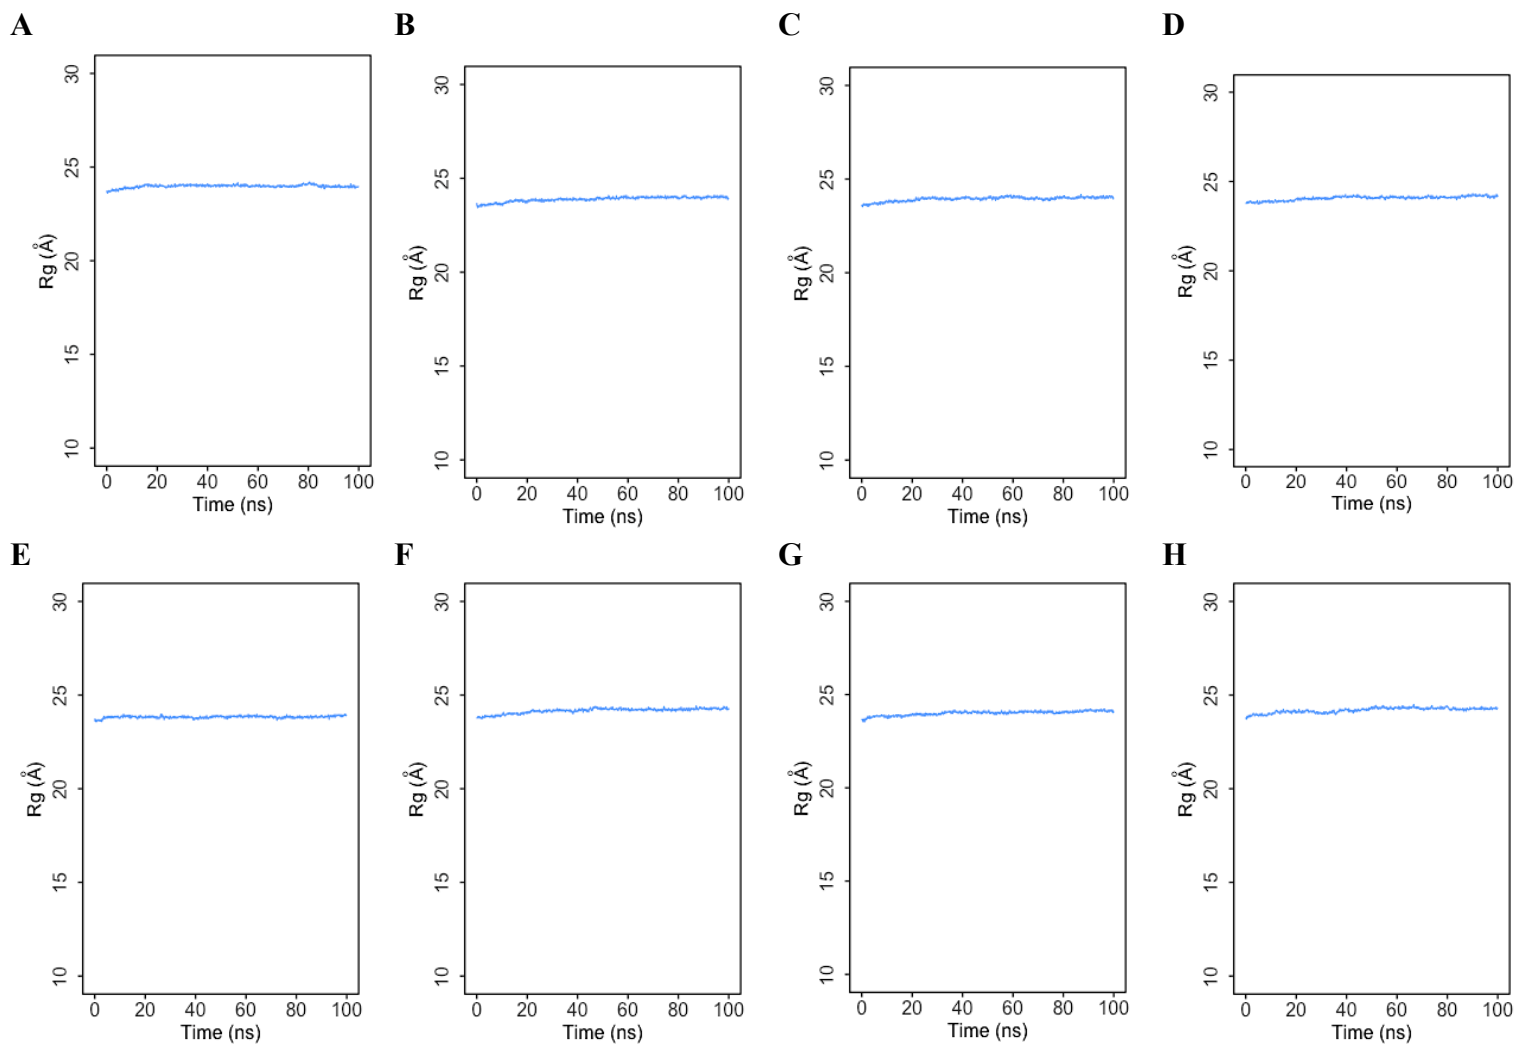

Figure S4: Radius of gyration ( $R_g$ ) of hemorphin peptides from the 100ns simulations of hemorphins bound to ACE1 and ACE2. (A)  $R_g$  of camel LVVHem6 with ACE1 and ACE2. (B)  $R_g$  of LVVHem6 with ACE1 (C)  $R_g$  of camel LVVHem5 with ACE1 (D)  $R_g$  of camel LVVHem7 with ACE1 (E)  $R_g$  of VVHem6 with ACE1 (F)  $R_g$  of LVVHem7 with ACE1 (G)  $R_g$  of LVVHem5 with ACE1 (H)  $R_g$  of camel Hem7 with ACE1.

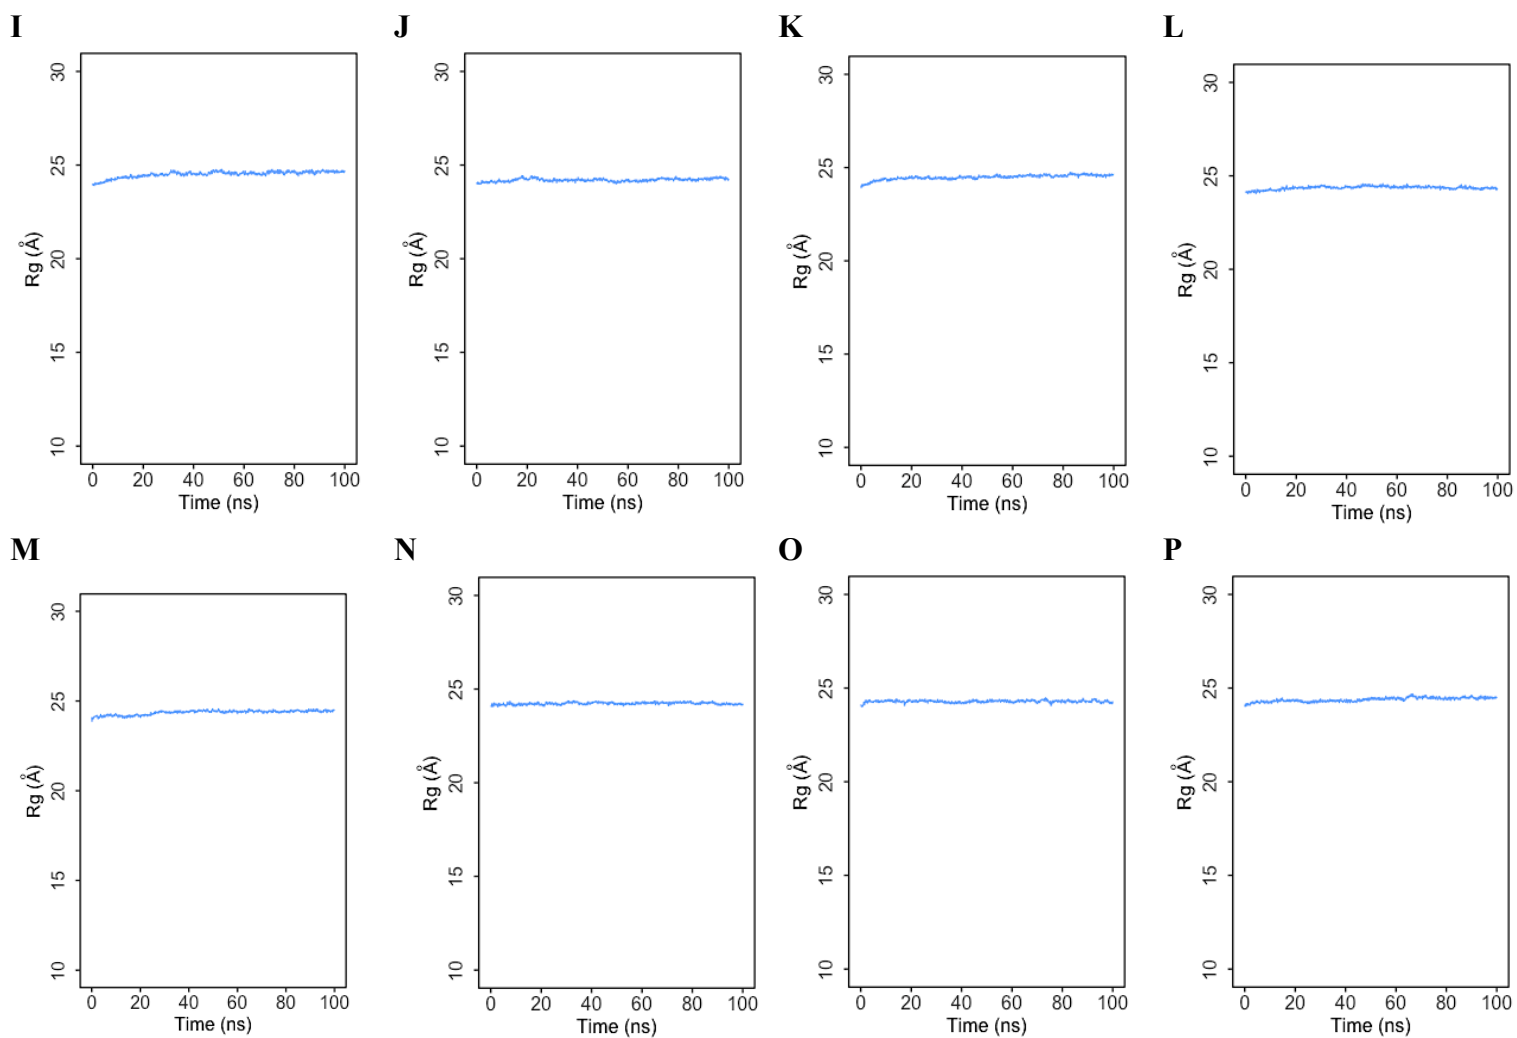

Figure S4: Radius of gyration (Rg) of hemorphin peptides from the 100ns simulations of hemorphins bound to ACE1 and ACE2. (I) Rg of camel LVVHem6 with ACE1 and ACE2. (J) Rg of LVVHem6 with ACE2 (K) Rg of camel LVVHem5 with ACE2 (L) Rg of camel LVVHem7 with ACE2 (M) Rg of VVHem6 with ACE2 (N) Rg of LVVHem7 with ACE2 (O) Rg of LVVHem5 with ACE2 (P) Rg of camel Hem7 with ACE2.



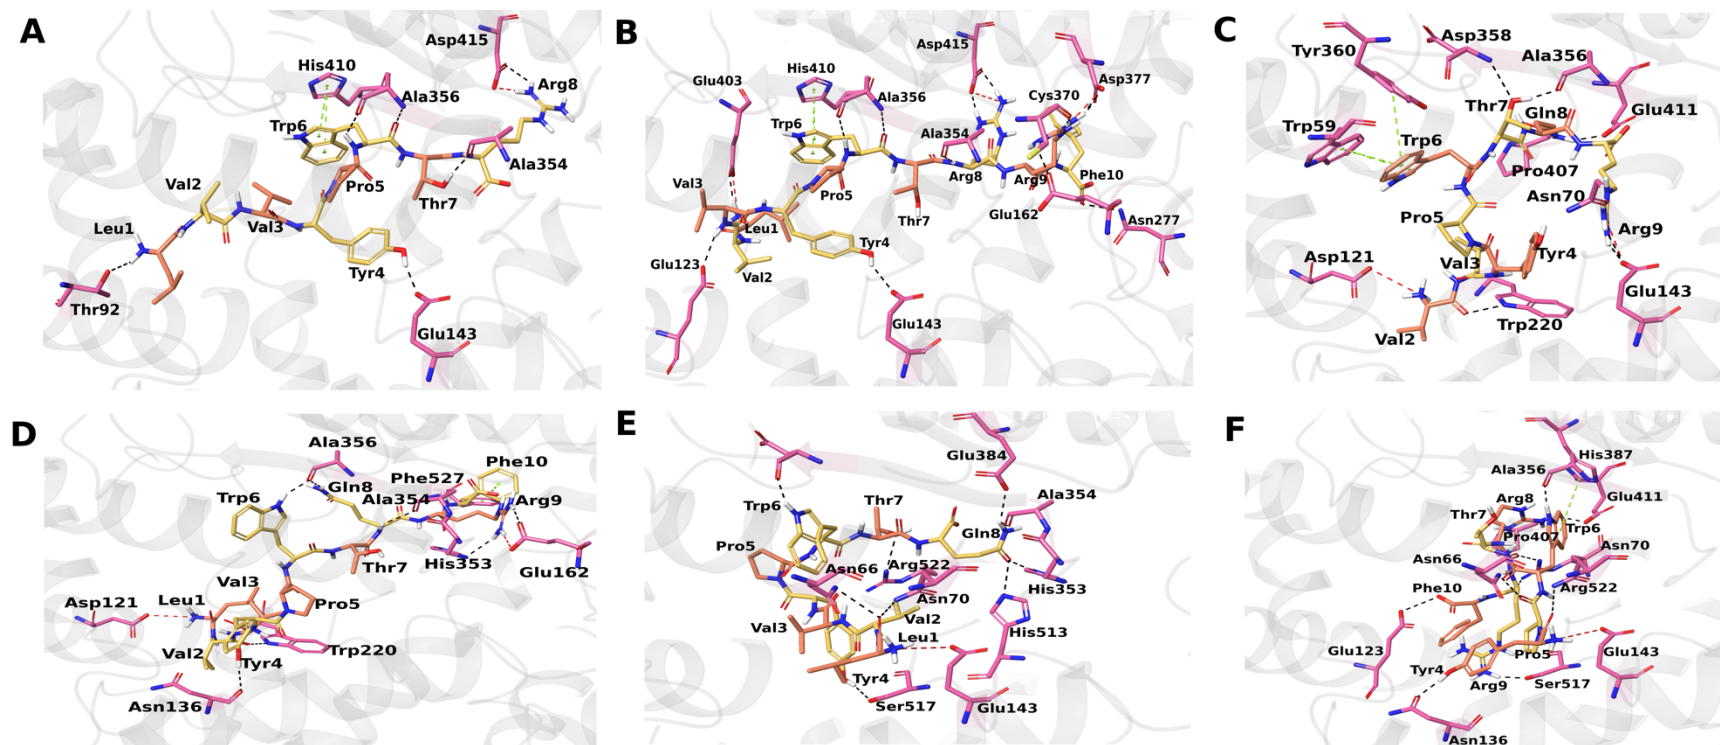

Figure S5. Docked pose and hydrogen bond interactions of the hemorphin peptides bound to ACE1. (A) Camel LVVHem5 with ACE1 (B) camel LVVHem7 with ACE1 (C) VVHem6 with ACE1 (D) LVVHem7 with ACE1 (E) LVVHem5 with ACE1 (F) camel Hem7 with ACE1. ACE1 is displayed in grey cartoon ribbons and its interacting residues are shown in pink stick display; the docked ligand is displayed in yellow and orange stick representation, hydrogen bonds are shown as black dashed lines, salt-bridges are shown in red,  $\pi$ - $\pi$  stacking depicted by light green dashed lines, and  $\pi$ -cation stacking are shown in dark green dashed lines.

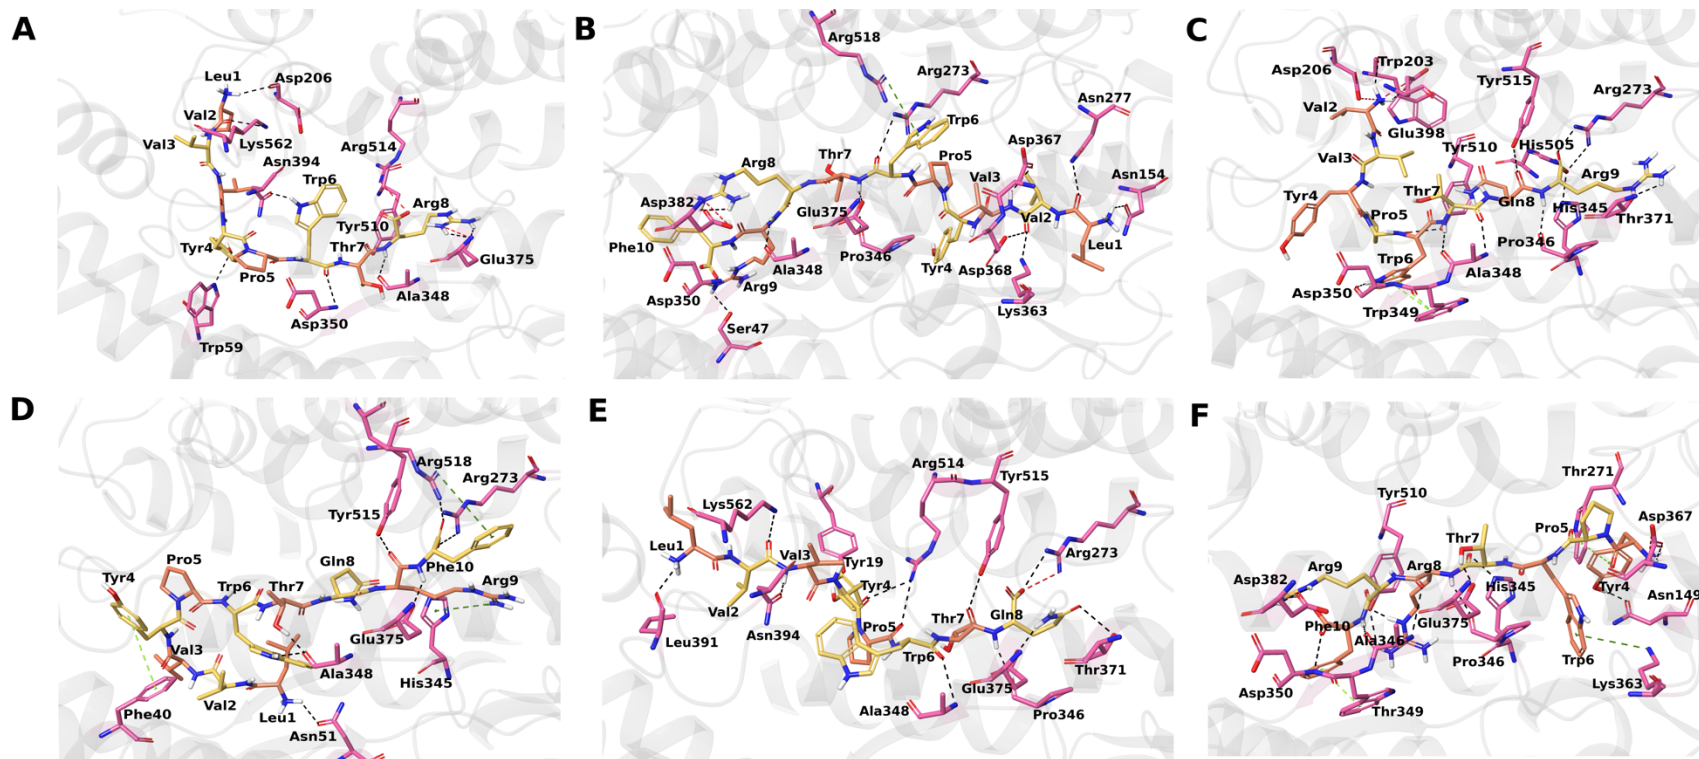

Figure S6. Docked pose and hydrogen bond interactions of the hemorhphin peptides bound to ACE2. (A) Camel LVVHem5 with ACE2 (B) camel LVVHem7 with ACE2 (C) VVHem6 with ACE2 (D) LVVHem7 with ACE2 (E) LVVHem5 with ACE2 (F) camel Hem7 with ACE2. ACE2 is displayed in grey cartoon ribbons and its interacting residues are shown in pink stick display; the docked ligand is displayed in yellow and orange stick representation, hydrogen bonds are shown as black dashed lines, salt-bridges are shown in red,  $\pi$ - $\pi$  stacking depicted by light green dashed lines, and  $\pi$ -cation stacking are shown in dark green dashed lines.

Table S1: Interactions of the best binding pose of the top-three to top-eight peptides with ACE1 (PDB ID: 2XY9) and ACE2 (PDB ID: 1R4L). The residues in bold form the active site.

| Peptide             | IC <sub>50</sub> ± SD against ACE1 | Glide Score (kcal/mol) | MM-GBSA (kcal/mol) | Residues forming Hydrogen bonds                                                       | Residues forming Hydrophobic interactions                                                                                                                                                                                                 | Residues forming Salt-bridge | Residues forming π-π or Cation-π contacts |
|---------------------|------------------------------------|------------------------|--------------------|---------------------------------------------------------------------------------------|-------------------------------------------------------------------------------------------------------------------------------------------------------------------------------------------------------------------------------------------|------------------------------|-------------------------------------------|
| ACE1 – PDB ID: 2XY9 |                                    |                        |                    |                                                                                       |                                                                                                                                                                                                                                           |                              |                                           |
| Camel LVVHem5       | 6.88 ± 1.89                        | -13.30                 | -109.52            | Thr92, Glu143, <b>His353, Ala354, Ala356, Asp415</b>                                  | Tyr51, Trp59, Tyr62, Ile88, Ala89, Leu122, Ala125, Val351, <b>Ala354, Ala356, Trp357, Tyr360, Val379, Val380, Phe391, Pro407, Phe512, Val518, Tyr523, Phe527</b>                                                                          | Asp415                       | His410                                    |
| Camel LVVHem7       | 11.15 ± 2.18                       | -16.20                 | -114.31            | Glu123, Glu143, <b>Glu162, Asn277, Ala354, Ala356, Cys370, Asp377, Glu403, Asp415</b> | Trp59, Tyr62, Ile88, Met223, Trp279, Cys352, <b>Ala354, Ala356, Trp357, Tyr360, Cys370, Val379, Val380, Phe391, Pro407, Phe457, Phe512, Val518, Pro519, Tyr523, Phe527</b>                                                                | Asp377<br>Glu403<br>Asp415   | His410                                    |
| VVHem6              | 12.69 ± 1.14                       | -13.50                 | -90.80             | Asn70, Glu143, Trp220, Ala356, Asp358, Pro407, Glu411                                 | Trp59, Tyr62, Ala63, Ile88, Leu139, Ile204, Ala207, Ala208, Tyr213, Ala216, Trp220, Met223, Val351, <b>Ala354, Ala356, Trp357, Tyr360, Phe391, Pro407, Phe512, Val518, Pro519, Tyr523</b>                                                 | Asp121<br>Glu143<br>Zn1628   | Trp59<br>Tyr360                           |
| LVVHem7             | 13.07 ± 2.87                       | -15.36                 | -98.54             | Asn136, <b>Glu162, Trp220, His353, Ala354, Ala356</b>                                 | Tyr62, Ala63, Leu81, Leu82, Tyr135, Leu139, Leu140, Ile204, Ala207, Ala208, Ala216, Trp220, Met223, Val351, Cys352, <b>Ala354, Ala356, Trp357, Cys370, Val379, Val380, Phe391, Pro407, Phe457, Phe512, Val518, Pro519, Tyr523, Phe527</b> | <b>Glu162</b><br>Asp121      | Phe527                                    |
| LVVHem5             | 20.12 ± 1.33                       | -12.94                 | -73.52             | Asn66, Asn70, <b>His353, Ala354, Asp358, Glu384, His513, Ser517, Arg522</b>           | Trp59, Tyr62, Ala63, Tyr69, Leu81, Leu139, Leu140, Ile204, Trp220, Val351, <b>Ala354, Ala356, Trp357, Phe359, Tyr360, Phe391, Phe512, Val518, Pro519, Tyr523</b>                                                                          | Glu143<br>Zn1628             |                                           |

|                     |                 |        |         |                                                                                                                                              |                                                                                                                                                                                                         |                                   |                                  |
|---------------------|-----------------|--------|---------|----------------------------------------------------------------------------------------------------------------------------------------------|---------------------------------------------------------------------------------------------------------------------------------------------------------------------------------------------------------|-----------------------------------|----------------------------------|
| Camel Hem7          | 23.57 ±<br>3.70 | -13.05 | -104.15 | Asn66, Asn70,<br>Glu123, Asn136,<br>Ala356, Pro407<br>Glu411, Ser517,<br>Arg522                                                              | Tyr62, Ala63, Tyr69,<br>Leu81, Tyr135, Leu139,<br>Leu140, Tyr200, Ile204,<br>Trp220, Met223<br>Val351, Ala356,<br>Trp357, Tyr360,<br>Phe391, Pro407,<br>Val518, Pro519,<br><b>Tyr523</b>                | Glu143                            | His387                           |
| ACE2 – PDB ID: 1R4L |                 |        |         |                                                                                                                                              |                                                                                                                                                                                                         |                                   |                                  |
| Camel<br>LVVHem5    |                 | -12.87 | -89.46  | Trp69, Asp206,<br>Ala348, Asp350,<br><b>Glu375</b> , Asp394,<br>Tyr510, Lys562                                                               | Phe40, Trp69, Leu73,<br>Leu95, Ala99, Tyr196,<br>Tyr202, <b>Pro346</b> ,<br>Ala348, Trp349,<br>Tyr385, Phe390,<br>Leu391, Leu392<br>Phe504, Tyr510,<br><b>Tyr515</b>                                    | <b>Glu375</b><br>Arg514<br>Zn803  |                                  |
| Camel<br>LVVHem7    |                 | -15.70 | -108.92 | Ser47, Asn154,<br>Asn277, <b>Arg273</b> ,<br><b>Pro346</b> , Ala348,<br>Lys363, Asp367,<br>Ash368, Asp350,<br><b>Glu375</b> , Asp382         | Phe40, Tyr127, Leu144,<br>Pro146, Ala153,<br>Trp271, Phe274,<br>Cys344, <b>Pro346</b> ,<br>Ala348, Trp349,<br>Met360, Cys361,<br>Leu370, Tyr385,<br>Leu503, Phe504,<br>Tyr510, <b>Tyr515</b>            | Asp382                            | Arg518                           |
| VVHem6              |                 | -14.63 | -102.25 | Trp203, <b>Arg273</b> ,<br><b>His345</b> , <b>Pro346</b> ,<br>Ala348, Asp350,<br>Thr371, Glu398,<br><b>His505</b> , Tyr510,<br><b>Tyr515</b> | Phe40, Trp69, Tyr202,<br>Trp203, Phe274,<br>Pro346, Ala348,<br>Trp349, Leu351,<br>Phe390, Phe504,<br>Tyr510, <b>Tyr515</b>                                                                              | Asp206<br><b>Arg273</b><br>Glu398 | Trp349                           |
| LVVHem7             |                 | -11.10 | -59.09  | Asn51, Ala348,<br><b>Glu375</b> , <b>Tyr515</b> ,<br>Arg518                                                                                  | Phe40, Tyr50, Met62,<br>Trp69, Leu73, Phe274,<br>Pro346, Ala348,<br>Trp349, Leu370,<br>Tyr385, Phe390,<br>Leu391 Phe504,<br>Tyr510, <b>Tyr515</b>                                                       | <b>Arg273</b>                     | Phe40<br><b>His345</b><br>Arg518 |
| LVVHem5             |                 | -14.39 | -89.63  | Tyr199, <b>Pro346</b> ,<br>Ala348, Thr371,<br><b>Glu375</b> , Leu391,<br>Asn394, Arg514,<br><b>Tyr515</b> , Lys562                           | Leu95, Ala99, Tyr199,<br>Tyr202, Trp203,<br>Pro346, Ala348,<br>Trp349, Ile379, Tyr385,<br>Leu391, Leu392,<br>Phe504, Tyr510,<br><b>Tyr515</b>                                                           | <b>Arg273</b> ,<br>Zn803          |                                  |
| Camel Hem7          |                 | -12.87 | -107.81 | Asn149, <b>His345</b> ,<br><b>Pro346</b> , Ala348,<br>Asp350, Asp367,<br><b>Glu375</b> , Asp382,<br>Tyr510                                   | Phe40, Leu144, Ala153,<br>Met270, Trp271,<br>Phe274, Val343,<br>Cys344, <b>Pro346</b> ,<br>Ala348, Trp349,<br>Leu351, Ala353,<br>Met360, Cys361,<br>Leu370, Tyr385,<br>Phe504, Tyr510,<br><b>Tyr515</b> | Asp367                            | Trp271<br>Trp349<br>Lys363       |

Table S2. The percentage of contact time during which intermolecular polar contacts were retained between ACE1 and the hemorphin peptides in the 100 ns simulation. The contact is specified when more than one interaction is formed. sb: salt bridge; hb (bb): backbone-backbone hydrogen bond; hb (sb): sidechain-backbone hydrogen bond; hb (bs): backbone-sidechain hydrogen bond.

| Camel LVVHem6                        | Time  | LVVHem6                              | Time  | Camel LVVHem5                        | Time  | Camel LVVHem7                        | Time  |
|--------------------------------------|-------|--------------------------------------|-------|--------------------------------------|-------|--------------------------------------|-------|
| ACE1:ASP377 - ARG9                   | 99.90 | ACE1:LYS511 - ARG9 <sup>sb</sup>     | 100   | ACE1:ASP415 - ARG8                   | 58.94 | ACE1:ASP453 - ARG8                   | 81.42 |
| ACE1:ASP415 - ARG8                   | 100   | ACE1:ASP453 - ARG9                   | 56.84 | ACE1:ASP453 - ARG8                   | 99.00 | ACE1:GLU123 - LEU1 <sup>sb</sup>     | 95.60 |
| ACE1:GLU123 - LEU1 <sup>sb</sup>     | 100   | ACE1:GLU123 - LEU1 <sup>sb</sup>     | 91.91 | ACE1:GLU123 - LEU1 <sup>sb</sup>     | 75.12 | ACE1:GLU162 - ARG9                   | 74.93 |
| ACE1:GLU162 - ARG9                   | 65.13 | ACE1:ALA354 - GLN8                   | 98.10 | ACE1:LYS511 - ARG8                   | 100   | ACE1:ASP121 - LEU1 <sup>sb</sup>     | 83.22 |
| ACE1:LYS511 - ARG9 <sup>sb</sup>     | 100   | ACE1:GLU123 - LEU1 <sup>hb(bs)</sup> | 80.22 | ACE1:HIS410 - TRP6                   | 82.22 | ACE1:ASP121 - LEU1 <sup>hb(bs)</sup> | 70.73 |
| ACE1:PHE391 - TRP6                   | 89.31 | ACE1:GLU411 - THR7                   | 69.53 | ACE1:ALA356 - TRP6                   | 67.23 | ACE1:GLU123 - LEU1 <sup>hb(bs)</sup> | 93.31 |
| ACE1:ALA354 - ARG8                   | 48.15 | ACE1:HIS513 - GLN8                   | 69.43 | ACE1:GLU123 - LEU1 <sup>hb(bs)</sup> | 61.84 | ACE1:ASN277 - PHE10                  | 66.83 |
| ACE1:GLU123 - LEU1 <sup>hb(bs)</sup> | 85.31 | ACE1:LYS511 - ARG9 <sup>hb(ss)</sup> | 97.70 | ACE1:ALA354 - THR7                   | 97.50 | ACE1:GLN281 - PHE10                  | 56.14 |
| ACE1:ARG522 - VAL3                   | 49.35 | ACE1:TYR520 - ARG9                   | 100   | ACE1:TYR523 - ARG8                   | 63.14 | ACE1:THR282 - PHE10                  | 60.24 |
| ACE1:LYS511 - ARG9 <sup>hb(ss)</sup> | 46.55 | ACE1:GLU162 - GLN8                   | 83.42 |                                      |       | ACE1:GLU403 - TRP6                   | 53.95 |
| ACE1:TYR523 - THR7                   | 92.61 | ACE1:GLU403 - TRP6                   | 50.45 |                                      |       | ACE1:ASP415 - ARG8                   | 69.53 |
| ACE1:HIS353 - ARG9                   | 52.25 |                                      |       |                                      |       |                                      |       |
| ACE1:HIS513 - THR7                   | 88.21 |                                      |       |                                      |       |                                      |       |
| VVHem6                               | Time  | LVVHem7                              | Time  | LVVHem5                              | Time  | Camel Hem7                           | Time  |
| ACE1:ASP121 - VAL2 <sup>sb</sup>     | 100   | ACE1:ASP121 - LEU1                   | 45.85 | ACE1:GLU143 - LEU1 <sup>sb</sup>     | 99.90 | ACE1:GLU403 - ARG8                   | 100   |
| ACE1:GLU123 - VAL2 <sup>sb</sup>     | 100   | ACE1:ASP377 - ARG9 <sup>sb</sup>     | 51.25 | ACE1:ASN66 - LEU1 <sup>hb(bs)</sup>  | 99.40 | ACE1:GLU143 - TYR4 <sup>sb</sup>     | 100   |
| ACE1:HIS513 - ARG9                   | 51.35 | ACE1:GLU123 - LEU1 <sup>sb</sup>     | 99.50 | ACE1:GLU143 - LEU1 <sup>hb(bs)</sup> | 91.41 | ACE1:ARG124 - PHE10                  | 100   |
| ACE1:TRP59 - TRP6                    | 78.42 | ACE1:GLU162 - ARG9                   | 99.90 | ACE1:ASN66 - LEU1 <sup>hb(ss)</sup>  | 99.20 | ACE1:GLU123 - ARG9                   | 93.21 |
| ACE1:GLU123 - VAL2 <sup>hb(bs)</sup> | 99.90 | ACE1:LYS511 - PHE10                  | 100   | ACE1:TYR360 - PRO5                   | 45.65 | ACE1:HIS410 - ARG8                   | 61.84 |
| ACE1:GLU123 - VAL3                   | 99.90 | ACE1:SER516 - TYR4                   | 90.51 | ACE1:ARG522 - THR7                   | 93.41 | ACE1:LYS118 - PHE10                  | 45.25 |
| ACE1:ASP121 - VAL2 <sup>hb(ss)</sup> | 98.90 | ACE1:SER355 - GLN8                   | 75.92 | ACE1:GLU411 - THR7                   | 95.40 | ACE1:SER516 - TYR4                   | 62.54 |
| ACE1:SER219 - VAL2                   | 92.61 | ACE1:GLU123 - LEU1 <sup>hb(bs)</sup> | 89.91 | ACE1:HIS353 - GLN8                   | 47.85 | ACE1:GLU143 - TYR4 <sup>hb(ss)</sup> | 93.21 |
| ACE1:TRP220 - VAL2                   | 92.71 | ACE1:TYR135 - VAL2                   | 55.84 |                                      |       | ACE1:SER517 - ARG9 <sup>hb(ss)</sup> | 53.85 |
| ACE1:GLU411 - GLN8                   | 99.30 | ACE1:HIS513 - ARG9                   | 98.00 |                                      |       | ACE1:ALA356 - TRP3                   | 53.65 |
| ACE1:SER516 - ARG9                   | 73.43 | ACE1:TYR520 - PHE10                  | 100   |                                      |       | ACE1:ARG124 - PHE10                  | 90.91 |
|                                      |       | ACE1:HIS353 - THR7                   | 60.24 |                                      |       | ACE1:LYS118 - PHE10                  | 48.25 |
|                                      |       | ACE1:GLU411 - GLN8                   | 93.11 |                                      |       | ACE1:ASN66 - PRO5                    | 88.91 |
|                                      |       | ACE1:ASP377 - ARG9 <sup>hb(ss)</sup> | 48.35 |                                      |       | ACE1:SER517 - ARG9 <sup>hb(ss)</sup> | 44.96 |
|                                      |       |                                      |       |                                      |       | ACE1:ASN136 - TYR4                   | 72.43 |

Table S3. The percentage of contact time during which intermolecular hydrophobic contacts were retained between ACE1 and the hemorphin peptides in the 100ns simulation.

| Camel LVVHem6 |       | LVVHem6   |       | Camel LVVHem5 |       | Camel LVVHem7 |       |
|---------------|-------|-----------|-------|---------------|-------|---------------|-------|
| ACE1-LEU1     |       | ACE1-LEU1 |       | ACE1-LEU1     |       | ACE1-LEU1     |       |
| ALA216        | 67.83 | LEU122    | 99.70 | ALA125        | 50.15 | LEU122        | 52.05 |
| ILE204        | 99.00 | MET223    | 60.04 | ILE88         | 100   | MET223        | 57.64 |
| PHE472        | 96.70 | TRP220    | 64.14 | LEU122        | 49.35 | TYR360        | 49.95 |
| TRP220        | 100   | TRP59     | 65.53 | TRP59         | 100   | TYR51         | 51.05 |
| TYR135        | 90.71 | TYR51     | 58.74 | TYR360        | 63.54 | VAL119        | 54.75 |
| TYR200        | 95.60 | VAL119    | 89.31 | TYR51         | 55.94 | ACE1-VAL2     |       |
| VAL518        | 87.31 | ACE1-VAL2 |       | ALA356        | 99.90 | PRO519        | 96.30 |
| ACE1-VAL2     |       | MET223    | 58.04 | TRP357        | 100   | TRP220        | 59.14 |
| LEU139        | 98.90 | PRO519    | 64.94 | ACE1-VAL2     |       | VAL518        | 99.50 |
| PRO519        | 100   | TRP220    | 61.64 | TYR360        | 100   | ACE1-VAL3     |       |
| TYR135        | 59.34 | VAL518    | 56.04 | TYR62         | 67.23 | ILE88         | 49.55 |
| TYR200        | 87.61 | ACE1-VAL3 |       | ACE1-VAL3     |       | TRP59         | 97.20 |
| TYR62         | 49.55 | LE88      | 50.35 | TYR62         | 68.93 | TYR360        | 69.43 |
| VAL518        | 100   | LEU139    | 49.15 | VAL518        | 96.70 | TYR62         | 80.42 |
| ACE1-VAL3     |       | TRP59     | 67.83 | ACE1-TYR4     |       | VAL518        | 55.04 |
| MET223        | 73.83 | TYR360    | 56.44 | PHE512        | 100   | ACE1-TYR4     |       |
| PRO519        | 100   | TYR62     | 82.42 | VAL518        | 100   | PHE512        | 88.91 |
| TRP220        | 90.81 | ACE1-TYR4 |       | ACE1-TRP6     |       | PRO519        | 57.34 |
| VAL518        | 100   | PHE512    | 99.80 | ALA354        | 83.72 | VAL518        | 100   |
| ACE1-TYR4     |       | VAL351    | 80.22 | ALA356        | 100   | ACE1-PRO5     |       |
| ALA356        | 100   | VAL518    | 100   | PHE391        | 100   | ALA356        | 90.51 |
| PHE391        | 100   | ACE1-PRO5 |       | PRO407        | 100   | TRP357        | 99.70 |
| TRP357        | 99.90 | ALA356    | 100   | TRP357        | 99.60 | ACE1-TRP6     |       |
| TYR360        | 77.72 | PHE391    | 78.32 | TYR394        | 64.64 | ALA356        | 100   |
| TYR394        | 98.10 | TRP357    | 100   |               |       | PHE391        | 100   |
| TYR523        | 100   | VAL518    | 77.92 |               |       | PRO407        | 75.62 |
| ACE1-PRO5     |       | ACE1-TRP6 |       |               |       | TRP357        | 99.40 |
| ALA356        | 100   | ALA354    | 82.82 |               |       | TYR360        | 84.22 |
| TRP357        | 100   | ALA356    | 100   |               |       | TYR523        | 83.82 |
| TYR523        | 92.41 | PHE391    | 100   |               |       | ACE1-PHE10    |       |
| VAL518        | 100   | PRO407    | 100   |               |       | PHE457        | 66.83 |
| ACE1-TRP6     |       | TRP357    | 99.70 |               |       | TRP279        | 72.43 |
| ALA356        | 100   | TYR394    | 90.31 |               |       | VAL379        | 89.31 |
| PHE391        | 100   | TYR523    | 80.82 |               |       | VAL380        | 92.31 |
| TRP357        | 99.90 |           |       |               |       |               |       |
| TYR394        | 98.10 |           |       |               |       |               |       |
| TYR523        | 100   |           |       |               |       |               |       |

| VVHem6    |       | LVVHem7    |       | LVVHem5   |       | Camel Hem7 |       |
|-----------|-------|------------|-------|-----------|-------|------------|-------|
| ACE1-VAL2 |       | ACE1-LEU1  |       | ACE1-LEU1 |       | ACE1-TYR4  |       |
| ALA126    | 96.20 | MET223     | 75.72 | LEU139    | 100   | LEU139     | 100   |
| ALA207    | 100   | PRO519     | 61.34 | LEU140    | 99.80 | LEU140     | 100   |
| ALA208    | 100   | TRP220     | 84.82 | LEU81     | 99.80 | LEU81      | 100   |
| ALA216    | 100   | ACE1-VAL2  |       | PHE512    | 96.60 | LEU82      | 84.52 |
| ILE204    | 100   | ALA207     | 97.90 | TRP357    | 99.40 | PHE512     | 86.61 |
| LEU122    | 99.60 | ALA216     | 59.74 | TYR62     | 100   | TRP357     | 62.74 |
| TRP220    | 100   | ILE204     | 100   | TYR69     | 99.80 | TYR62      | 100   |
| TYR135    | 98.80 | LEU139     | 89.51 | ACE1-VAL2 |       | TYR69      | 100   |
| TYR213    | 100   | TRP220     | 99.90 | PHE512    | 100   | VAL518     | 79.42 |
| ACE1-VAL3 |       | TYR135     | 100   | TRP357    | 67.43 | ACE1-PRO5  |       |
| ALA216    | 40.86 | ACE1-VAL3  |       | VAL518    | 100   | LEU139     | 100   |
| ILE204    | 96.60 | ILE204     | 54.15 | ACE1-VAL3 |       | TYR62      | 88.21 |
| MET223    | 100   | LEU139     | 66.93 | TRP59     | 85.91 | VAL518     | 89.11 |
| PRO519    | 99.70 | PRO519     | 99.90 | TYR360    | 98.40 | ACE1-TRP6  |       |
| TRP220    | 100   | TRP220     | 80.62 | TYR62     | 100   | ALA354     | 97.30 |
| TYR135    | 70.43 | TYR135     | 60.64 | VAL518    | 99.40 | ALA356     | 99.80 |
| ACE1-TYR4 |       | VAL518     | 100   | ACE1-TYR4 |       | PHE391     | 56.64 |
| LEU139    | 100   | ACE1-TYR4  |       | MET223    | 83.02 | TRP357     | 100   |
| MET223    | 49.25 | LEU139     | 100   | PRO519    | 100   | TYR360     | 49.35 |
| PRO519    | 100   | LEU140     | 100   | TRP220    | 99.90 | TYR523     | 63.94 |
| TRP220    | 89.41 | LEU81      | 97.50 | VAL518    | 98.50 | VAL518     | 100   |
| TRP357    | 51.15 | PHE512     | 63.54 | ACE1-PRO5 |       | ACE1-PHE10 |       |
| TYR200    | 72.93 | TYR62      | 98.50 | ALA400    | 91.11 | ALA400     | 99.90 |
| VAL518    | 100   | TYR69      | 74.23 | TRP59     | 52.65 | LEU401     | 96.10 |
| ACE1-TRP6 |       | VAL518     | 90.81 | TYR360    | 100   | MET223     | 96.20 |
| ALA125    | 87.61 | ACE1-PRO5  |       | TYR394    | 77.62 | PHE570     | 80.02 |
| ALA400    | 85.61 | LEU139     | 59.44 | VAL399    | 91.41 | TRP59      | 83.72 |
| ALA89     | 97.10 | PHE512     | 99.90 | ACE1-TRP6 |       | TYR360     | 92.51 |
| ILE88     | 99.70 | VAL518     | 100   | ALA356    | 100   | VAL399     | 99.80 |
| TRP357    | 52.35 | ACE1-TRP6  |       | ALA63     | 95.40 |            |       |
| TRP59     | 100   | ALA356     | 97.90 | PHE359    | 82.52 |            |       |
| TYR360    | 100   | PHE391     | 97.90 | PHE391    | 100   |            |       |
| TYR51     | 98.70 | TRP357     | 100   | TRP357    | 100   |            |       |
| TYR62     | 92.11 | TYR360     | 53.35 | TYR360    | 99.80 |            |       |
| VAL399    | 97.00 | VAL518     | 99.60 | TYR394    | 74.93 |            |       |
|           |       | ACE1-PHE10 |       |           |       |            |       |
|           |       | PHE457     | 100   |           |       |            |       |
|           |       | PHE460     | 50.25 |           |       |            |       |
|           |       | PHE527     | 99.60 |           |       |            |       |

|  |        |     |  |  |
|--|--------|-----|--|--|
|  | TYR520 | 100 |  |  |
|  | TYR523 | 100 |  |  |



Table S4. The percentage of contact time during which intermolecular polar contacts were retained between ACE2 and the hemorpin peptides residues in the 100 ns simulation. The contact is specified when more than one interaction is formed. sb: salt bridge; hb (bb): backbone-backbone hydrogen bond; hb (sb): sidechain-backbone hydrogen bond; hb (bs): backbone-sidechain hydrogen bond.

| Camel LVVHem6                    |       | LVVHem6                              |       | Camel LVVHem5                        |       | Camel LVVHem7                        |       |
|----------------------------------|-------|--------------------------------------|-------|--------------------------------------|-------|--------------------------------------|-------|
| ACE2:ARG273 - ARG9 <sup>sb</sup> | 56.34 | ACE2:ARG273 - ARG9                   | 74.93 | ACE2:GLU375 - ARG8                   | 99.80 | ACE2:ASP382 - ARG8                   | 84.92 |
| ACE2:ASP206 - LEU1 <sup>sb</sup> | 99.90 | ACE2:ASP206 - LEU1 <sup>sb</sup>     | 95.70 | ACE2:ARG514 - ARG8 <sup>sb</sup>     | 98.50 | ACE2:HIS374 - TRP6                   | 94.01 |
| ACE2:ASP367 - ARG8               | 85.91 | ACE2:GLU406 - ARG9                   | 95.30 | ACE2:ARG514 - TRP6                   | 98.60 | ACE2:PHE274 - TRP6                   | 56.64 |
| ACE2:ASP367 - ARG9               | 66.03 | ACE2:HIS374 - ARG9                   | 72.53 | ACE2:PHE390 - TYR4                   | 49.55 | ACE2:ALA348 - ARG8 <sup>hb(bb)</sup> | 99.10 |
| ACE2:GLU398 - LEU1 <sup>sb</sup> | 88.91 | ACE2:PRO346 - ARG9                   | 91.41 | ACE2:TYR196 - LEU1                   | 48.35 | ACE2:ASN149 - VAL2                   | 99.10 |
| ACE2:HIS401 - TRP6               | 86.61 | ACE2:ALA348 - THR7                   | 89.51 | ACE2:ASP206 - VAL3                   | 97.80 | ACE2:ASN277 - LEU1                   | 80.72 |
| ACE2:ALA348 - TRP6               | 98.20 | ACE2:ASP206 - LEU1 <sup>hb(bs)</sup> | 72.63 | ACE2:ALA348 - THR7                   | 94.71 | ACE2:ALA348 - ARG8 <sup>hb(sb)</sup> | 63.64 |
| ACE2:ASN394 - LEU1 <sup>hb</sup> | 90.31 | ACE2:TYR510 - TRP6                   | 57.04 | ACE2:ALA99 - TYR4                    | 89.81 | ACE2:TYR510 - THR7                   | 46.15 |
| ACE2:ASP206 - LEU1               | 94.61 | ACE2:HIS345 - ARG9                   | 47.65 | ACE2:ARG514 - ARG8 <sup>hb(sb)</sup> | 96.80 | ACE2:GLU406 - TRP6                   | 99.80 |
| ACE2:GLU398 - LEU1 <sup>hb</sup> | 88.91 | ACE2:ARG514 - THR7                   | 53.05 | ACE2:ARG514 - THR7                   | 99.90 |                                      |       |
| ACE2:PRO346 - THR7               | 99.20 |                                      |       | ACE2:LYS562 - VAL3                   | 96.90 |                                      |       |
| ACE2:TYR510 - PRO5               | 84.22 |                                      |       | ACE2:PRO346 - ARG8                   | 83.02 |                                      |       |
| ACE2:ARG273 - ARG9 <sup>hb</sup> | 77.62 |                                      |       | ACE2:GLU398 - TRP6                   | 90.41 |                                      |       |
| ACE2:ASN394 - LEU1 <sup>hb</sup> | 51.35 |                                      |       |                                      |       |                                      |       |
| VVHem6                           |       | LVVHem7                              |       | LVVHem5                              |       | Camel Hem7                           |       |
| ACE2:ARG273 - ARG9 <sup>sb</sup> | 100   | ACE2:ARG273 - :PHE10                 | 100   | ACE2:ARG518 - GLN8                   | 86.21 | ACE2:ASP367 - TYR4                   | 80.62 |
| ACE2:ASP206 - VAL2 <sup>sb</sup> | 100   | ACE2:ARG518 - PHE10                  | 48.65 | ACE2:PHE390 - LEU1                   | 76.92 | ACE2:ASP382 - ARG9                   | 51.15 |
| ACE2:GLU398 - VAL2 <sup>sb</sup> | 100   | ACE2:GLU145 - ARG9                   | 95.80 | ACE2:PHE40 - LEU1                    | 69.33 | ACE2:TRP649 - PHE10                  | 90.71 |
| ACE2:ASP367 - ARG9 <sup>sb</sup> | 65.23 | ACE2:SER124 - LEU1                   | 46.85 | ACE2:HIS401 - TRP6                   | 99.50 | ACE2:HIS345 - TRP6                   | 50.55 |
| ACE2:ASP206 - VAL2 <sup>hb</sup> | 84.22 | ACE2:ALA348 - THR7                   | 75.32 | ACE2:PHE390 - LEU1                   | 69.63 | ACE2:ALA348 - PHE10                  | 98.80 |
| ACE2:GLU398 - VAL2 <sup>hb</sup> | 99.90 | ACE2:ARG273 - PHE10                  | 100   | ACE2:PRO346 - GLN8                   | 53.65 | ACE2:ASP367 - TYR4                   | 60.24 |
| ACE2:GLU398 - VAL3 <sup>hb</sup> | 99.40 | ACE2:ARG518 - PHE10                  | 99.90 | ACE2:ALA348 - TRP6                   | 95.10 | ACE2:TYR510 - ARG8                   | 53.45 |
| ACE2:TYR515 - GLN8 <sup>hb</sup> | 47.95 | ACE2:ARG514 - TRP6                   | 74.33 | ACE2:ASN394 - LEU1                   | 72.53 | ACE2:ASP350 - ARG9                   | 98.10 |
| ACE2:PHE390 - TYR4 <sup>sb</sup> | 63.14 |                                      |       | ACE2:ARG518 - GLN8                   | 84.12 | ACE2:ASP382 - ARG9                   | 48.85 |
| ACE2:TYR510 - PRO5 <sup>hb</sup> | 53.35 |                                      |       | ACE2:TYR510 - PRO5                   | 97.70 | ACE2:GLU145 - TRP6                   | 67.13 |
| ACE2:ALA348 - THR7 <sup>hb</sup> | 86.31 |                                      |       | ACE2:HIS505 - THR7                   | 56.54 |                                      |       |
| ACE2:ARG273 - ARG9 <sup>hb</sup> | 66.33 |                                      |       | ACE2:TYR515 - GLN8                   | 96.10 |                                      |       |
|                                  |       |                                      |       | ACE2:ASP509 - TYR4                   | 89.81 |                                      |       |
|                                  |       |                                      |       | ACE2:GLU375 - GLN8                   | 100   |                                      |       |

Table S5. The percentage of contact time during which intermolecular hydrophobic contacts were retained between ACE2 and the hemorphin peptides in the 100 ns simulation.

| Camel LVVHem6 |       | LVVHem6   |       | Camel LVVHem5 |       | Camel LVVHem7 |       |
|---------------|-------|-----------|-------|---------------|-------|---------------|-------|
| ACE2-LEU1     |       | ACE2-LEU1 |       | ACE2-LEU1     |       | ACE2-LEU1     |       |
| TRP203        | 62.14 | LEU391    | 100   | ALA99         | 68.53 | ALA153        | 99.10 |
| TYR202        | 99.10 | LEU73     | 97.70 | TYR196        | 100   | PHE274        | 60.94 |
| ACE2-VAL2     |       | PHE390    | 95.90 | TYR202        | 83.52 | ACE2-VAL2     |       |
| LEU391        | 60.64 | TRP203    | 84.92 | ACE2-PRO5     |       | ALA153        | 82.42 |
| PHE390        | 99.90 | TRP69     | 92.81 | LEU391        | 96.20 | LEU144        | 99.50 |
| PHE40         | 100   | TYR202    | 99.40 | PHE390        | 100   | LEU148        | 88.01 |
| TRP69         | 97.80 | ACE2-VAL2 |       | PHE40         | 100   | MET152        | 100   |
| ACE2-VAL3     |       | LEU391    | 69.73 | TYR385        | 75.72 | MET270        | 100   |
| PHE40         | 88.11 | PHE390    | 96.90 | ACE2-VAL2     |       | TRP271        | 75.12 |
| TYR202        | 76.52 | PHE40     | 92.11 | ALA99         | 100   | ACE2-VAL3     |       |
| ACE2-TYR4     |       | TRP203    | 53.15 | LEU391        | 97.50 | LEU144        | 95.40 |
| TRP203        | 99.80 | TRP69     | 99.30 | LEU392        | 78.82 | MET270        | 60.24 |
| TYR510        | 100   | TYR510    | 60.34 | LEU95         | 91.71 | PHE274        | 81.22 |
| ACE2-PRO5     |       | ACE2-VAL3 |       | ACE2-TYR4     |       | PRO346        | 97.10 |
| ALA348        | 100   | MET190    | 56.14 | ALA99         | 93.11 | TRP271        | 100   |
| TRP349        | 100   | TRP203    | 95.20 | LEU100        | 91.01 | ACE2-TYR4     |       |
| TYR510        | 100   | TRP69     | 99.30 | LEU391        | 100   | CYS344        | 99.20 |
| ACE2-TRP6     |       | TYR199    | 99.60 | LEU73         | 99.80 | LEU143        | 75.92 |
| ALA348        | 100   | TYR510    | 99.10 | PHE32         | 64.54 | LEU144        | 100   |
| ILE379        | 66.63 | ACE2-TYR4 |       | PHE390        | 100   | PHE504        | 90.71 |
| PRO346        | 98.70 | LEU120    | 100   | PHE40         | 98.90 | PRO346        | 100   |
| TRP349        | 99.80 | PHE40     | 50.25 | TRP69         | 96.40 | TRP168        | 98.40 |
| TYR385        | 93.61 | TRP69     | 99.40 | ACE2-TRP6     |       | TRP271        | 100   |
| TYR510        | 99.00 | TYR510    | 100   | ALA348        | 64.34 | TYR127        | 96.90 |
|               |       | ACE2-PRO5 |       | PHE40         | 59.64 | VAL343        | 52.95 |
|               |       | PHE40     | 100   | TRP349        | 89.61 | ACE2-PRO5     |       |

|               |        |                |        |                |        |                   |        |
|---------------|--------|----------------|--------|----------------|--------|-------------------|--------|
|               |        | TRP349         | 99.30  | TYR510         | 70.93  | LEU503            | 96.90  |
|               |        | TRP69          | 99.30  |                |        | PHE274            | 65.93  |
|               |        | TYR510         | 70.03  |                |        | PHE504            | 99.80  |
|               |        | ACE2-TRP6      |        |                |        | PHE512            | 100    |
|               |        | ALA348         | 100    |                |        | PRO346            | 99.30  |
|               |        | PHE40          | 59.14  |                |        | TRP271            | 99.40  |
|               |        | PHE504         | 86.71  |                |        | TYR515            | 100    |
|               |        | TRP349         | 100    |                |        | ACE2-TRP6         |        |
|               |        | TYR510         | 100    |                |        | LEU370            | 100    |
|               |        |                |        |                |        | PHE274            | 94.51  |
|               |        |                |        |                |        | PRO346            | 100    |
|               |        |                |        |                |        | TYR515            | 100    |
|               |        |                |        |                |        | ACE2-PHE10        |        |
|               |        |                |        |                |        | PHE40             | 68.63  |
|               |        |                |        |                |        | TRP349            | 70.53  |
|               |        |                |        |                |        | TYR510            | 91.91  |
| <b>VVHem6</b> |        | <b>LVVHem7</b> |        | <b>LVVHem5</b> |        | <b>Camel Hem7</b> |        |
| ACE2-VAL2     |        | ACE2-LEU1      |        | ACE2-LEU1      |        | ACE2-TYR4         |        |
| TRP203        | 99.60  | LEU120         | 97.90  | ALA99          | 99.70  | ALA153            | 95.10  |
| TYR202        | 99.80  | MET62          | 100.00 | LEU391         | 100.00 | LEU370            | 49.75  |
| ACE2-VAL3     |        | PHE504         | 99.80  | LEU392         | 70.53  | MET152            | 75.82  |
| TRP203        | 87.41  | TRP349         | 90.21  | PHE390         | 100.00 | MET270            | 76.62  |
| TYR510        | 100.00 | TYR50          | 78.52  | PHE40          | 99.10  | PHE274            | 100.00 |
| ACE2-TYR4     |        | ACE2-VAL2      |        | TRP69          | 61.64  | PRO346            | 54.45  |
| LEU391        | 96.10  | LEU120         | 50.05  | ACE2-VAL2      |        | TRP271            | 51.75  |
| LEU392        | 78.62  | TRP349         | 67.13  | LEU73          | 93.51  | ACE2-PRO5         |        |
| PHE390        | 98.90  | TYR510         | 93.21  | PHE390         | 69.83  | LEU370            | 93.51  |
| PHE40         | 99.70  | ACE2-VAL3      |        | PHE40          | 94.31  | PHE274            | 99.30  |
| TYR510        | 56.74  | LEU120         | 85.01  | TRP69          | 90.61  | PRO346            | 68.53  |
| ACE2-PRO5     |        | PHE40          | 53.85  | ACE2-VAL3      |        | ACE2-TRP6         |        |

|           |        |            |        |           |        |            |        |
|-----------|--------|------------|--------|-----------|--------|------------|--------|
| ALA348    | 80.42  | TRP69      | 100.00 | PHE40     | 99.40  | LEU144     | 100.00 |
| PHE40     | 90.00  | TYR510     | 90.51  | ACE2-TYR4 |        | LEU503     | 80.02  |
| TRP349    | 98.80  | ACE2-TYR4  |        | LEU120    | 95.70  | PHE274     | 53.85  |
| TYR510    | 100.00 | ALA99      | 51.65  | TYR199    | 76.52  | PHE504     | 81.52  |
| ACE2-TRP6 |        | LEU391     | 98.70  | TYR510    | 100.00 | PRO346     | 94.51  |
| ALA348    | 100.00 | LEU73      | 59.04  | ACE2-PRO5 |        | TRP271     | 64.04  |
| PHE504    | 71.93  | PHE390     | 100.00 | ALA348    | 98.20  | TYR127     | 72.23  |
| PRO346    | 50.85  | PHE40      | 100.00 | PHE504    | 70.13  | TYR515     | 64.74  |
| TRP349    | 100.00 | TRP69      | 100.00 | TRP349    | 100.00 | ACE2-PHE10 |        |
| TYR510    | 100.00 | TYR510     | 96.50  | TYR510    | 100.00 | ALA348     | 100.00 |
|           |        | ACE2-PRO5  |        | ACE2-TRP6 |        | LEU351     | 95.00  |
|           |        | PHE40      | 94.21  | ALA348    | 100.00 | PHE40      | 91.01  |
|           |        | TYR510     | 98.60  | ILE379    | 51.75  | TRP349     | 100.00 |
|           |        | ACE2-TRP6  |        | PRO346    | 99.40  | TYR510     | 84.12  |
|           |        | ALA348     | 62.54  | TRP349    | 100.00 |            |        |
|           |        | PHE40      | 100.00 | TYR510    | 97.90  |            |        |
|           |        | PHE504     | 91.41  |           |        |            |        |
|           |        | TRP349     | 91.41  |           |        |            |        |
|           |        | TYR510     | 99.90  |           |        |            |        |
|           |        | ACE2-PHE10 |        |           |        |            |        |
|           |        | LEU370     | 99.20  |           |        |            |        |
|           |        | PHE274     | 100.00 |           |        |            |        |
|           |        | PRO346     | 99.50  |           |        |            |        |
|           |        | TYR515     | 99.50  |           |        |            |        |

## Appendix

### **IC<sub>50</sub> values of initial single-run peptide screening.**

All the purchased peptides were screened in an initial run at 0, 10, 50, 100, 200, and 500  $\mu$ M. Of the eighteen peptides purchased, Hem5, LVVHem4, and camel Hem6 did not dissolve during sample preparation.

| S.No | IC <sub>50</sub>    | Hemorphin     | Peptide sequence |
|------|---------------------|---------------|------------------|
| 1    | 14.916              | LVVHem6       | LVVYPWTQR        |
| 2    | 21.197              | Camel LVVHem5 | LVVYPWTR         |
| 3    | 25.806              | Camel LVVHem7 | LVVYPWTRRF       |
| 4    | 25.922              | Camel LVVHem6 | LVVYPWTRR        |
| 5    | 29.264              | LVVHem7       | LVVYPWTQRF       |
| 6    | 30.333              | VVHem6        | VVYPWTQR         |
| 7    | 36.736              | LVVHem5       | LVVYPWTQ         |
| 8    | 44.074              | Camel Hem7    | YPWTRRF          |
| 9    | 44.135              | Camel VVHem6  | VVYPWTRR         |
| 10   | 51.371              | Camel VVHem7  | VVYPWTRRF        |
| 11   | 63.105              | VVHem7        | VVYPWTQRF        |
| 12   | 78.751              | Camel Hem5    | YPWTR            |
| 13   | 80.196              | Hem6          | YPWTQR           |
| 14   | 95.129              | Hem7          | YPWTQRF          |
| 15   | No IC <sub>50</sub> | Hem4          | YPWT             |
| 16   | —                   | Hem5          | YPWTQ            |
| 17   | —                   | LVVHem4       | LVVYPWT          |
| 18   | —                   | Camel Hem6    | YPWTRR           |
